# Supplementary material
Source: publisher figshare collection journal article supplement (https://frontiersin.figshare.com/ndownloader/files/14131421)
Supplement: Supplementary file 1 [file 14131421]

| **Name** | **Length (km)** | **Nº of obstacles (overall escape area)** | **Nº of obstacles (pedestrian area only)** | **Percentage of escape area occupied by micro-vulnerabilities (%)** | | | |
| --- | --- | --- | --- | --- | --- | --- | --- |
| **Case 1** | **Case 2** | **Case 3** | **Case 4** |
| **1 Norte** | 3 | 1311 | 442 | 32.7 | 10.2 | 7.6 | 10.1 |
| **2 Norte** | 2.7 | 1417 | 1251 | 32.3 | 36.5 | 13.9 | 9.9 |
| **3 Norte** | 2.5 | 587 | 587 | 7.7 | 16.2 | 4.0 | 8.3 |
| **4 Norte** | 2.4 | 1414 | 1262 | 36.8 | 38.1 | 19.9 | 11.8 |
| **5 Norte** | 2.3 | 1536 | 1425 | 36.6 | 39.0 | 19.0 | 12.6 |
| **6 Norte** | 2.3 | 725 | 652 | 24.6 | 19.0 | 15.7 | 9.6 |
| **7 Norte** | 2 | 687 | 623 | 32.2 | 21.0 | 21.5 | 11.1 |
| **8 Norte** | 2 | 784 | 733 | 20.7 | 15.7 | 12.8 | 8.4 |
| **9 Norte** | 1.45 | 772 | 712 | 33.8 | 18.3 | 16.5 | 9.4 |
| **10 Norte** | 1.45 | 820 | 763 | 34.9 | 34.5 | 16.8 | 8.5 |
| **11 Norte** | 1.1 | 647 | 618 | 39.4 | 37.7 | 19.3 | 9.9 |
| **12 Norte** | 1.22 | 753 | 725 | 38.3 | 37.6 | 18.6 | 9.9 |
| **13 Norte** | 0.97 | 371 | 357 | 35.2 | 38.2 | 15.5 | 7.3 |
| **14 Norte** | 1.12 | 609 | 584 | 19.2 | 23.3 | 7.8 | 5.3 |
| **15 Norte** | 0.66 | 235 | 185 | 53.6 | 51.3 | 20.4 | 20.4 |
| **15.1 Norte** | 1.1 | 489 | 372 | 30.4 | 32.5 | 9.0 | 12.7 |
| **15.2 Norte** | 0.97 | 481 | 364 | 20.3 | 13.4 | 5.0 | 5.9 |
